# Supplementary material
Source: PubMed Central journal article supplement (PMC5226416)
Supplement: NIHMS840095-supplement-Supplemental.pdf [file NIHMS840095-supplement-Supplemental.pdf]

## Supporting Information

### Self-Assembly Mechanisms of Nanofibers from Peptide Amphiphiles in Solution and on Substrate Surfaces

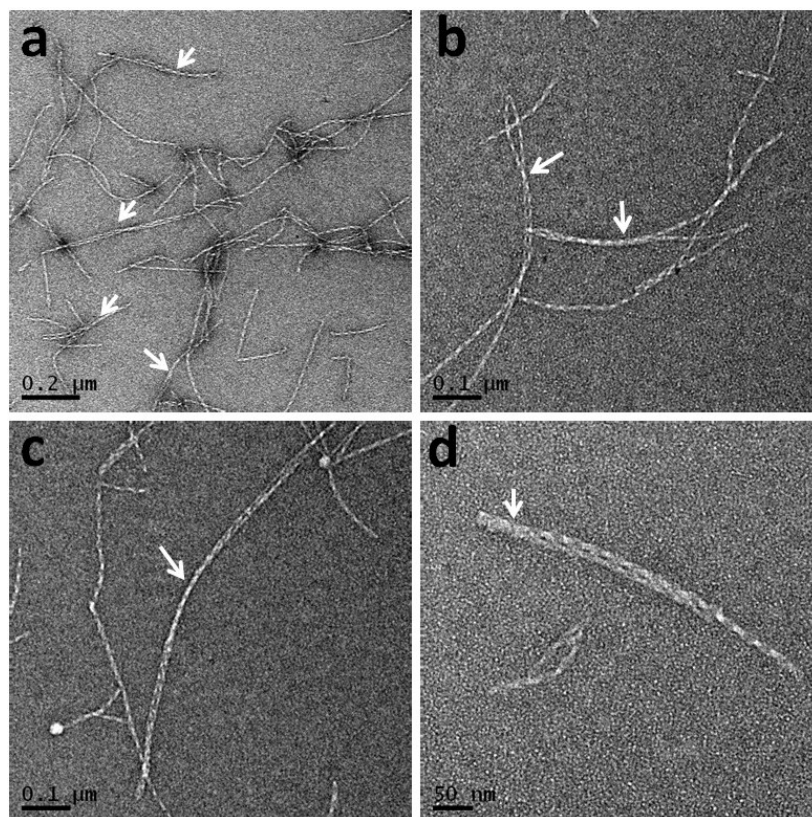

**Figure S1.** Representative TEM images of twisted nanofibers.

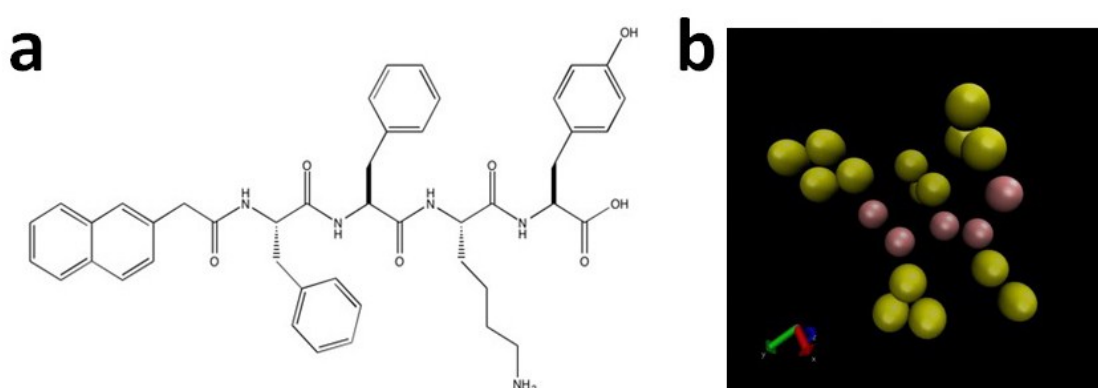

**Figure S2.** Peptide structure (left) and coarse-grained molecular model (right) used in the simulation. Peptide backbone carbon (pink), amino-acid residue carbon (yellow). Phenyl group is represented with three CG carbon atoms while naphthyl group with four CG carbon atoms.
